# Supplementary material
Source: MDPI journal article supplement (https://www.mdpi.com/2076-3417/12/3/943)
Supplement: s1 [file s1]

**a) 3D map UAV initial and final positions**

|                | <b>Crowded Large map</b> |                   |                 |
|----------------|--------------------------|-------------------|-----------------|
|                | <b>UAV 1</b>             | <b>UAV 2</b>      | <b>UAV 3</b>    |
| <i>Initial</i> | (0, 0, 0)                | (0, 500, 0)       | (0, 1000, 0)    |
| <i>Final</i>   | (1000, 1000, 1000)       | (1000, 500, 1000) | (1000, 0, 1000) |

**b) 3D map boundary**

| <b>Map</b>        | <b>Start boundary</b> | <b>End Boundary</b> |
|-------------------|-----------------------|---------------------|
| Crowded Large map | (0, 0, 0)             | (1000, 1000, 1000)  |

**c) 3D obstacles for relevant map**

| <b>Obstacles number</b> | <b>Crowded Large map</b>       | <b>Obstacles number</b> | <b>Crowded Large map</b>       | <b>Obstacles number</b> | <b>Crowded Large map</b>       |
|-------------------------|--------------------------------|-------------------------|--------------------------------|-------------------------|--------------------------------|
| <b>1</b>                | (10, 890, 0) - (40, 920, 15)   | <b>51</b>               | (210, 190, 0) - (240, 220, 15) | <b>101</b>              | (910, 180, 0) - (940, 210, 15) |
| <b>2</b>                | (30, 930, 0) - (60, 960, 15)   | <b>52</b>               | (0, 160, 0) - (30, 190, 15)    | <b>102</b>              | (920, 250, 0) - (950, 280, 15) |
| <b>3</b>                | (70, 940, 0) - (100, 970, 15)  | <b>53</b>               | (50, 140, 0) - (80, 170, 15)   | <b>103</b>              | (850, 270, 0) - (880, 300, 15) |
| <b>4</b>                | (160, 940, 0) - (190, 970, 15) | <b>54</b>               | (90, 120, 0) - (120, 150, 15)  | <b>104</b>              | (830, 320, 0) - (870, 350, 15) |
| <b>5</b>                | (110, 930, 0) - (140, 960, 15) | <b>55</b>               | (50, 80, 0) - (80, 110, 15)    | <b>105</b>              | (890, 290, 0) - (920, 320, 15) |
| <b>6</b>                | (60, 890, 0) - (90, 920, 15)   | <b>56</b>               | (160, 50, 0) - (190, 80, 15)   | <b>106</b>              | (690, 450, 0) - (720, 480, 15) |
| <b>7</b>                | (30, 850, 0) - (60, 880, 15)   | <b>57</b>               | (190, 110, 0) - (220, 140, 15) | <b>107</b>              | (575, 480, 0) - (605, 510, 15) |
| <b>8</b>                | (80, 850, 0) - (110, 880, 15)  | <b>58</b>               | (260, 140, 0) - (290, 170, 15) | <b>108</b>              | (650, 520, 0) - (680, 550, 15) |
| <b>9</b>                | (100, 890, 0) - (130, 920, 15) | <b>59</b>               | (150, 290, 0) - (180, 320, 15) | <b>109</b>              | (720, 510, 0) - (750, 540, 15) |
| <b>10</b>               | (140, 880, 0) - (170, 910, 15) | <b>60</b>               | (130, 150, 0) - (160, 180, 15) | <b>110</b>              | (660, 570, 0) - (690, 600, 15) |
| <b>11</b>               | (180, 900, 0) - (210, 930, 15) | <b>61</b>               | (220, 0, 0) - (300, 80, 45)    | <b>111</b>              | (620, 620, 0) - (650, 650, 15) |
| <b>12</b>               | (200, 860, 0) - (230, 890, 15) | <b>62</b>               | (330, 200, 0) - (390, 230, 25) | <b>112</b>              | (720, 570, 0) - (750, 600, 15) |

|           |                                |           |                                |            |                                 |
|-----------|--------------------------------|-----------|--------------------------------|------------|---------------------------------|
| <b>13</b> | (160, 840, 0) - (190, 870, 15) | <b>63</b> | (330, 0, 0) - (550, 160, 60)   | <b>113</b> | (670, 660, 0) - (700, 690, 15)  |
| <b>14</b> | (210, 820, 0) - (240, 850, 15) | <b>64</b> | (500, 190, 0) - (540, 260, 20) | <b>114</b> | (710, 620, 0) - (740, 650, 15)  |
| <b>15</b> | (170, 800, 0) - (200, 830, 15) | <b>65</b> | (570, 20, 0) - (610, 90, 25)   | <b>115</b> | (780, 530, 0) - (810, 560, 15)  |
| <b>16</b> | (130, 880, 0) - (160, 810, 15) | <b>66</b> | (600, 150, 0) - (630, 180, 15) | <b>116</b> | (720, 690, 0) - (750, 720, 15)  |
| <b>17</b> | (120, 820, 0) - (150, 850, 15) | <b>67</b> | (610, 110, 0) - (640, 140, 15) | <b>117</b> | (770, 570, 0) - (800, 600, 15)  |
| <b>18</b> | (90, 750, 0) - (120, 780, 15)  | <b>68</b> | (600, 50, 0) - (690, 80, 15)   | <b>118</b> | (820, 550, 0) - (850, 580, 15)  |
| <b>19</b> | (80, 800, 0 - 110, 830, 15)    | <b>69</b> | (580, 180, 0) - (610, 220, 15) | <b>119</b> | (810, 590, 0) - (840, 620, 15)  |
| <b>20</b> | (40, 810, 0) - (70, 840, 15)   | <b>70</b> | (700, 80, 0) - (730, 110, 15)  | <b>120</b> | (760, 680, 0) - (790, 710, 15)  |
| <b>21</b> | (60, 700, 0) - (90, 730, 15)   | <b>71</b> | (650, 100, 0) - (680, 130, 15) | <b>121</b> | (790, 630, 0) - (820, 660, 15)  |
| <b>22</b> | (110, 680, 0) - (140, 710, 15) | <b>72</b> | (650, 150, 0) - (680, 180, 15) | <b>122</b> | (860, 570, 0) - (890, 600, 15)  |
| <b>23</b> | (160, 650, 0) - (190, 680, 15) | <b>73</b> | (630, 190, 0) - (660, 220, 15) | <b>123</b> | (850, 610, 0) - (880, 640, 15)  |
| <b>24</b> | (50, 630, 0) - (80, 660, 15)   | <b>74</b> | (600, 230, 0) - (630, 260, 15) | <b>124</b> | (830, 650, 0) - (870, 680, 15)  |
| <b>25</b> | (30, 590, 0) - (60, 620, 15)   | <b>75</b> | (640, 240, 0) - (670, 270, 15) | <b>125</b> | (810, 690, 0) - (840, 720, 15)  |
| <b>26</b> | (80, 590, 0) - (110, 620, 15)  | <b>76</b> | (670, 190, 0) - (700, 220, 15) | <b>126</b> | (830, 770, 0) - (870, 860, 20)  |
| <b>27</b> | (120, 590, 0) - (150, 620, 15) | <b>77</b> | (690, 120, 0) - (720, 150, 15) | <b>127</b> | (620, 800, 0) - (820, 1000, 45) |
| <b>28</b> | (200, 600, 0) - (230, 630, 15) | <b>78</b> | (730, 10, 0) - (760, 40, 15)   | <b>128</b> | (500, 810, 0) - (570, 840, 20)  |
| <b>29</b> | (160, 580, 0) - (190, 610, 15) | <b>79</b> | (770, 50, 0) - (800, 80, 15)   | <b>129</b> | (490, 870, 0) - (610, 1000, 40) |
| <b>30</b> | (220, 560, 0) - (250, 590, 15) | <b>80</b> | (740, 100, 0) - (770, 130, 15) | <b>130</b> | (415, 910, 0) - (455, 980, 15)  |
| <b>31</b> | (50, 550, 0) - (80, 580, 15)   | <b>81</b> | (730, 140, 0) - (760, 170, 15) | <b>131</b> | (340, 920, 0) - (370, 950, 15)  |
| <b>32</b> | (100, 550, 0) - (130, 580, 15) | <b>82</b> | (710, 180, 0) - (740, 210, 15) | <b>132</b> | (290, 900, 0) - (320, 930, 15)  |
| <b>33</b> | (60, 510, 0) - (90, 540, 15)   | <b>83</b> | (680, 230, 0) - (710, 260, 15) | <b>133</b> | (360, 870, 0) - (390, 900, 15)  |
| <b>34</b> | (140,520,0) - (170, 550, 15)   | <b>84</b> | (670, 300, 0) - (700, 330, 15) | <b>134</b> | (270, 850 ,0) - (300, 880, 15)  |
| <b>35</b> | (60, 450 ,0) - (90, 480, 15)   | <b>85</b> | (730, 310, 0) - (760, 340, 15) | <b>135</b> | (320, 830, 0) - (350, 850, 15)  |
| <b>36</b> | (110, 450, 0) - (140, 480, 15) | <b>86</b> | (730, 240, 0) - (760, 270, 15) | <b>136</b> | (370, 800, 0) - (400, 830, 15)  |
| <b>37</b> | (150, 580, 0) - (180, 510, 15) | <b>87</b> | (750, 200, 0) - (780, 230, 15) | <b>137</b> | (410, 780, 0) - (440, 810, 15)  |
| <b>38</b> | (190, 500, 0) - (220, 530, 15) | <b>88</b> | (770, 160, 0) - (800, 190, 15) | <b>138</b> | (425, 730, 0) - (455, 760, 15)  |
| <b>39</b> | (180, 540, 0) - (210, 570, 15) | <b>89</b> | (810, 80, 0) - (840, 110, 15)  | <b>139</b> | (460, 680, 0) - (490, 710, 15)  |
| <b>40</b> | (230, 520, 0) - (260, 550, 15) | <b>90</b> | (780, 120, 0) - (810, 150, 15) | <b>140</b> | (390, 670 ,0) - (420, 700, 15)  |
| <b>41</b> | (80, 390, 0) - (110, 420, 15)  | <b>91</b> | (835, 40, 0) - (865, 70, 15)   | <b>141</b> | (360, 730, 0) - (390, 760, 15)  |
| <b>42</b> | (30, 360, 0) - (60, 390, 15)   | <b>92</b> | (850, 110, 0) - (880, 140, 15) | <b>142</b> | (320, 750, 0) - (350, 780, 15)  |

|           |                                 |            |                                |            |                                |
|-----------|---------------------------------|------------|--------------------------------|------------|--------------------------------|
| <b>43</b> | (120 , 340, 0) - (150, 370, 15) | <b>93</b>  | (890, 65, 0) - (920, 95, 15)   | <b>143</b> | (280, 780, 0) - (310, 810, 15) |
| <b>44</b> | (30, 300, 0) - (60, 330, 15)    | <b>94</b>  | (900, 120, 0) - (930, 150, 15) | <b>144</b> | (220, 760, 0) - (250, 790, 15) |
| <b>45</b> | (10, 260, 0) - (40, 290, 15)    | <b>95</b>  | (860, 160, 0) - (890, 190, 15) | <b>145</b> | (260, 710, 0) - (230, 740, 15) |
| <b>46</b> | (60, 260, 0) - (90, 290, 15)    | <b>96</b>  | (820, 190, 0) - (850, 220, 15) | <b>146</b> | (310, 650 ,0) - (330, 680, 15) |
| <b>47</b> | (140, 250, 0) - (170, 280, 15)  | <b>97</b>  | (770, 240, 0) - (800, 270, 15) | <b>147</b> | (350, 620, 0) - (380, 650, 15) |
| <b>48</b> | (40, 200, 0) - (70, 230, 15)    | <b>98</b>  | (780, 300, 0) - (810, 330, 15) | <b>148</b> | (425, 850, 0) - (455, 880, 15) |
| <b>49</b> | (100, 200, 0) - (130, 230, 15)  | <b>99</b>  | (810, 250, 0) - (840, 280, 15) | <b>149</b> | (470, 760, 0) - (500, 790, 15) |
| <b>50</b> | (160, 210, 0) - (190, 240, 15)  | <b>100</b> | (865, 210, 0) - (895, 240, 15) | <b>150</b> | (310, 700, 0) - (340, 730, 15) |
